# Supplementary material
Source: HighWire-hosted journal article supplement (https://jnm.snmjournals.org/highwire/filestream/101940/field_highwire_adjunct_files/0/245241_Supplemental_Data.pdf)
Supplement: 245241_Supplemental_Data.pdf [file 245241_Supplemental_Data.pdf]

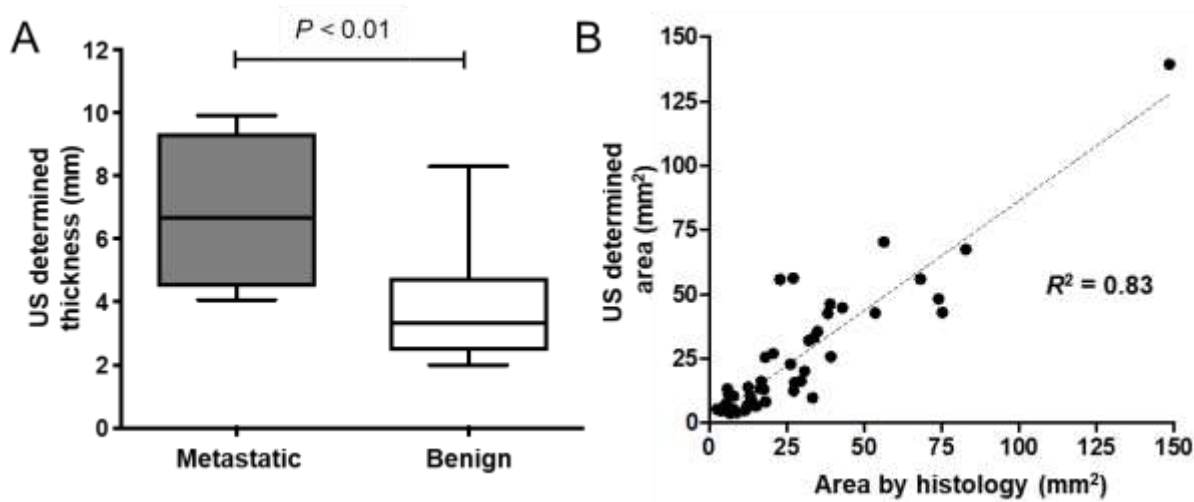

**Supplemental Figure 1: Measured LN size of 53 LN from seven patients with head and neck cancer.**

(A) From a total of 53 LNs measuring less than 10 mm in diameter, ultrasound determined the diameter in metastatic LNs was  $6.8\text{mm} \pm 2.5\text{mm}$  vs.  $3.7\text{mm} \pm 1.6\text{mm}$  for benign LNs ( $P < 0.01$ ). (B) Correlation was found between the ultrasound determined area and area by histology ( $R^2 = 0.83$ ,  $P < 0.01$ ).

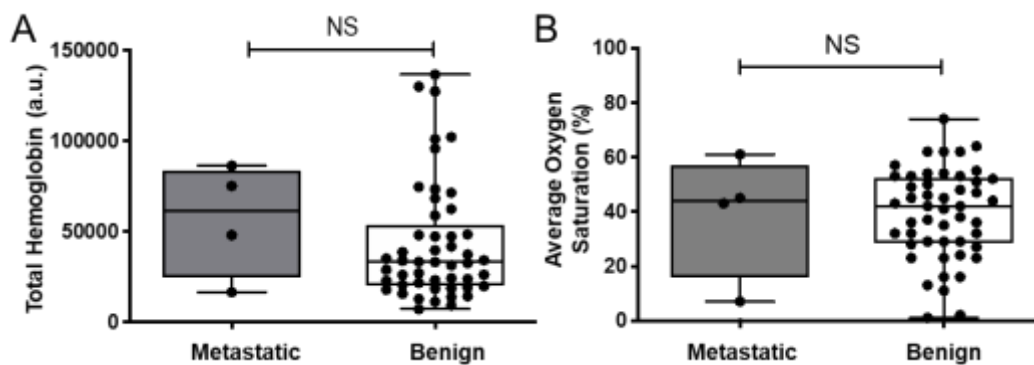

**Supplemental Figure 2: Photoacoustic measurements of total hemoglobin and oxygen saturation in LNs.**

No statistically significant differences in hemoglobin content or oxygen saturation were found between benign and metastatic LNs from patients with head and neck cancer.
